# Supplementary material for: A dye-decolorizing peroxidase from Bacillus subtilis exhibiting substrate-dependent optimum temperature for dyes and β-ether lignin dimer
Source: PubMed Central journal article supplement — Sci Rep. 2015 Feb 4;5:8245. doi: 10.1038/srep08245 (PMC4316163; doi:10.1038/srep08245), 2015-02-04
Supplement: srep08245-s1.pdf [file srep08245-s1.pdf]

## Supplementary Information

### **A dye-decolorizing peroxidase from *Bacillus subtilis* exhibiting substrate-dependent optimum temperature for dyes and $\beta$ -ether lignin dimer**

Kyoungseon Min<sup>1</sup>, Gyeongtaek Gong<sup>1,2</sup>, Han Min Woo<sup>1</sup>, Yunje Kim<sup>1</sup>, and Youngsoon Um<sup>1\*</sup>,

<sup>1</sup>Clean Energy Research Center, Korea Institute of Science and Technology, Seoul 136-791,  
Republic of Korea

<sup>2</sup>Interdisciplinary program of Bioengineering, Seoul National University, Seoul 151-741,  
Republic of Korea

\*Corresponding author, Dr. Youngsoon Um

[yum@kist.re.kr](mailto:yum@kist.re.kr), +82-2-958-5819, +82-2-958-6858 (FAX)

Number of figures: 1

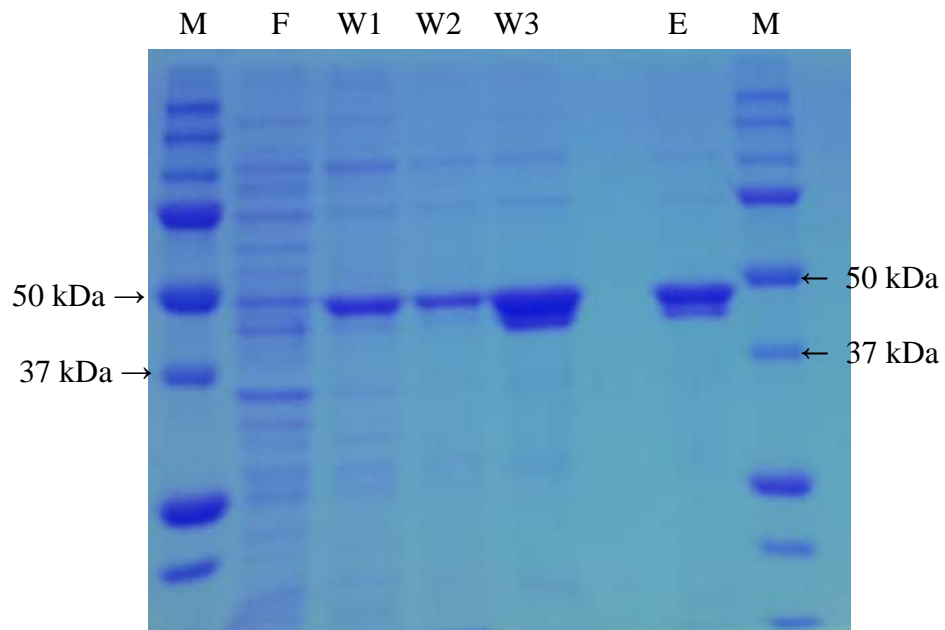

**Figure S1.** SDS-PAGE of purified BsDyP using 10 % acrylamide gel. M: prestained protein standard. F: flow through fraction W1: wash fraction with 20 mM imidazole W2: wash fraction with 50 mM imidazole W3: wash fraction with 80 mM imidazole E: elution fraction with 250 mM imidazole
